# Supplementary material
Source: PubMed Central journal article supplement (PMC3039300)
Supplement: NIHMS268419-supplement-Supplem_Data.pdf [file NIHMS268419-supplement-Supplem_Data.pdf]

## Supplemental Information

### Activity-Based Profiling

### Reveals Reactivity of the Murine

### Thymoproteasome-Specific Subunit $\beta$ 5t

Bogdan I. Florea, Martijn D. Verdoes, Nan Li, Wouter A. van der Linden, Paul P. Geurink, Hans van den Elst, Tanja Hofmann, Arnoud de Ru, Peter A. van Veelen, Keiji Tanaka, Katsuhiko Sasaki, Shigeo Murata, Hans den Dulk, Jaap Brouwer, Ferry A. Ossendorp, Alexei F. Kisselev, and Herman S. Overkleeft

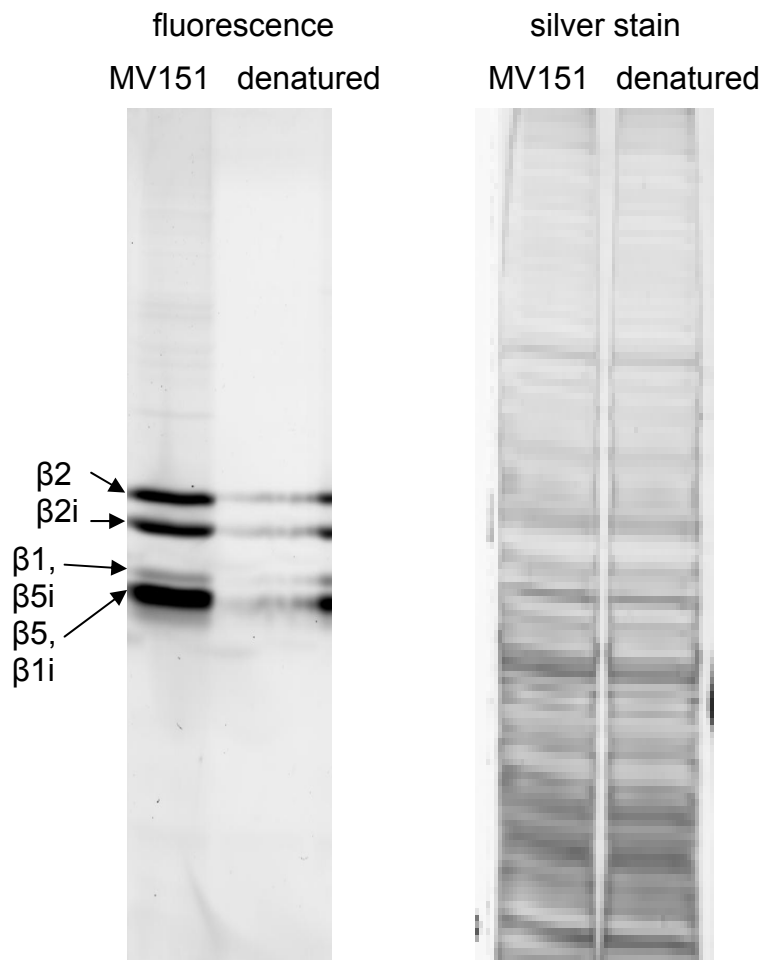

**Figure S1, related to Figure 2A.**

Fluorescence and silver stain detection of EL4 (murine thymoma cell line) cell lysate incubated with the fluorescent, broad-spectrum proteasome activity-based probe MV151. Some 20  $\mu$ g protein was incubated with 0.5  $\mu$ M MV151 for 60' at 37°C, resolved by 12.5% SDS-PAGE and imaged by fluorescence scanning followed by silver staining of the same gel. In the denatured lane, the lysate was deactivated by boiling with 1% SDS prior to the MV151 incubation.

**Table S1, related to Figure 2B. Protein Identification of Silver Stained Bands Captured by Probe 3 in Figure 2B, by In-gel Digestion and LC-MS analysis**

| prot acc              | mass (Da) | cover % AA | z  | ppm | pept score | peptide sequence |                                         |
|-----------------------|-----------|------------|----|-----|------------|------------------|-----------------------------------------|
| Psmb11<br>IPI00221461 | (β5t)     | 27834      | 20 | 2   | -0.29      | 50               | SLEQELEAK                               |
|                       |           |            |    | 2   | -0.54      | 39               | ESGWEYVSR                               |
|                       |           |            |    | 2   | 0.05       | 34               | LLGTTSGTSADCATWYR                       |
|                       |           |            |    | 3   | 0.00       | 25               | GYHYDMTIQEAYTLAR                        |
|                       |           |            |    | 2   | -1.20      | 41               | GTTAVLTEK                               |
| Psmb7<br>IPI00136483  | (β2)      | 25235      | 57 | 2   | 0.39       | 64               | DGIVLGADTR                              |
|                       |           |            |    | 3   | 0.14       | 42               | FRPDMEEEEAK *                           |
|                       |           |            |    | 2   | -0.63      | 45               | LDFLRPFSVPNK *                          |
|                       |           |            |    | 3   | 0.58       | 34               | LDFLRPFSVPNKK **                        |
|                       |           |            |    | 2   | 2.14       | 129              | LPYVTMGSGSLAAMAVFEDK                    |
|                       |           |            |    | 3   | -0.19      | 64               | VTPLEIEVLEETVQTMDS #                    |
|                       |           |            |    | 4   | 5.34       | 100              | IHFISPNIYCCGAGTAADTDMTTQLISSNLELHSLTTGR |
|                       |           |            |    | 2   | 0.20       | 25               | DGVILGADTR                              |
| Psmb10<br>IPI00316736 | (β2i)     | 24789      | 18 | 2   | -0.42      | 44               | ALSTPTEPVQR                             |
|                       |           |            |    | 2   | 1.54       | 85               | EVRPLTLELLEETVQAMEVE #                  |
|                       |           |            |    | 2   | 0.09       | 56               | QVLLGDQIPK                              |
| Psmb6<br>IPI00119239  | (β1)      | 21982      | 48 | 2   | -2.05      | 76               | LAAIQESGVER                             |
|                       |           |            |    | 2   | -0.46      | 132              | DECLQFTANALALAMER                       |
|                       |           |            |    | 2   | 1.65       | 100              | QSFAIGGSGSSYIYGYYVDATYR                 |
|                       |           |            |    | 4   | 4.96       | 36               | SGSAADTQAVADAVTYQLGFHSIELNEPPLVHTAASLFK |
|                       |           |            |    | 2   | 0.71       | 72               | ATAGSYISSLR                             |
| Psmb8<br>IPI00116712  | (β5i)     | 22635      | 42 | 2   | 0.00       | 42               | FQHGIVAVDSR                             |
|                       |           |            |    | 2   | -1.03      | 73               | VESSDVSDLLYK                            |
|                       |           |            |    | 2   | -0.35      | 63               | GPGLYYVDDNGTR                           |
|                       |           |            |    | 2   | -0.34      | 60               | QDLSPEEAYDLGR                           |
|                       |           |            |    | 2   | 0.95       | 72               | VIEINPYLLGTMSGCAADCQYWER                |
|                       |           |            |    | 2   | 0.23       | 24               | ATAGAYIASQTVK                           |
|                       |           |            |    | 2   | -0.28      | 48               | GPGLYYVDSEGNR                           |
| Psmb9<br>IPI00309379  | (β1i)     | 21313      | 17 | 2   | 0.67       | 79               | FTTNAITLAMNR                            |
|                       |           |            |    | 2   | -0.43      | 101              | DGSSGGVIYLVITITAAGVDHR                  |

**Table S1, related to Figure 2B.** Protein accession numbers, mass of the active β subunit, % coverage of the protein by amino acids identified by LC-MS, charge of the peptide (z), measurement error (ppm), Mascot peptide scores, one (\*) or two (\*\*) miss cleavages, and C-terminal peptides (#). Mascot identifications were manually validated.

**Table S2, related to Figure 2B. Protein identification after affinity purification with probe 3, on-bead digestion with trypsin and LC-MS analysis**

| prot acc              | mass (Da) | cover % AA | z  | ppm | pept score | peptide sequence |                   |
|-----------------------|-----------|------------|----|-----|------------|------------------|-------------------|
| Psmb11<br>IPI00221461 | (β5t)     | 27834      | 34 | 2   | -0.89      | 47               | HGVIAAADTR        |
|                       |           |            |    | 2   | 1.30       | 21               | EGQLPSVAGTAK      |
|                       |           |            |    | 2   | 0.41       | 76               | LLAAMMSCYR        |
|                       |           |            |    | 2   | -2.14      | 93               | SSCGSYVACPASR     |
|                       |           |            |    | 2   | 0.76       | 71               | ACGIYPEPATPQGAR   |
|                       |           |            |    | 2   | 1.67       | 130              | LLGTTSGTSADCATWYR |

|                      |       |       |                                             |                       |       |       |                                         |   |       |    |               |
|----------------------|-------|-------|---------------------------------------------|-----------------------|-------|-------|-----------------------------------------|---|-------|----|---------------|
| Psmb7<br>IPI00136483 | (β2)  | 25235 | 50                                          | 2                     | 1.89  | 99    | ELFVEQEEVTPEDCAIIMK                     |   |       |    |               |
|                      |       |       |                                             | 2                     | 0.43  | 27    | QMLFR                                   |   |       |    |               |
|                      |       |       |                                             | 2                     | 1.09  | 70    | FRPDMEEEEAK                             |   |       |    |               |
|                      |       |       |                                             | 2                     | 3.42  | 55    | LDFLRPFVSPNK                            |   |       |    |               |
|                      |       |       |                                             | 2                     | -0.80 | 57    | FRPDMEEEEAKK *                          |   |       |    |               |
|                      |       |       |                                             | 3                     | 0.13  | 45    | LDFLRPFVSPNKK *                         |   |       |    |               |
|                      |       |       |                                             | 3                     | 2.19  | 38    | SKLDFLRPFVSPNK *                        |   |       |    |               |
|                      |       |       |                                             | 2                     | -4.89 | 62    | LPYVTMGSGSLAAMAVFEDK                    |   |       |    |               |
|                      |       |       |                                             | 2                     | -1.17 | 111   | VTPLEIEVLEETVQTMDS #                    |   |       |    |               |
|                      |       |       |                                             | 2                     | -0.11 | 129   | LVSEAIAGIFNDLGSGSNIDLCVISK              |   |       |    |               |
|                      |       |       |                                             | 3                     | 3.18  | 57    | KLVSEAIAGIFNDLGSGSNIDLCVISK *           |   |       |    |               |
|                      |       |       |                                             | 3                     | 0.28  | 173   | IHFISPNYCCGAGTAADTDMTTQLISSNLELHSLTTGR  |   |       |    |               |
|                      |       |       |                                             | Psmb10<br>IPI00316736 | (β2i) | 24789 | 65                                      | 2 | -0.29 | 61 | ATNDSVVADK    |
| 2                    | 0.00  | 40    | MELHALSTGR                                  |                       |       |       |                                         |   |       |    |               |
| 2                    | -0.60 | 39    | FAPGTPVLTR                                  |                       |       |       |                                         |   |       |    |               |
| 2                    | -1.12 | 121   | IYCCGAGVAADTEMTR                            |                       |       |       |                                         |   |       |    |               |
| 2                    | 0.35  | 167   | LPFTALGSGQGAVALLEDR                         |                       |       |       |                                         |   |       |    |               |
| 2                    | 0.73  | 93    | EVRPLTLELLEETVQAMEVE #                      |                       |       |       |                                         |   |       |    |               |
| 4                    | 0.77  | 53    | YQGHV GASLVVGGVDLNGPQLYEVHPHGSYSR           |                       |       |       |                                         |   |       |    |               |
| 2                    | 0.35  | 58    | DGSSGGVIR                                   |                       |       |       |                                         |   |       |    |               |
| Psmb6<br>IPI00119239 | (β1)  | 21982 | 74                                          | 2                     | -0.21 | 50    | FTIATLPPP #                             |   |       |    |               |
|                      |       |       |                                             | 2                     | 0.55  | 78    | TTTGSYIANR                              |   |       |    |               |
|                      |       |       |                                             | 2                     | 1.28  | 91    | LAAIQESGVER                             |   |       |    |               |
|                      |       |       |                                             | 2                     | -1.59 | 55    | LTPIHDFHIFCCR                           |   |       |    |               |
|                      |       |       |                                             | 2                     | 1.59  | 132   | DECLQFTANALALAMER                       |   |       |    |               |
|                      |       |       |                                             | 2                     | 1.27  | 129   | QSFAIGGSGSSYIYGYVDATYR                  |   |       |    |               |
|                      |       |       |                                             | 3                     | 1.68  | 32    | EGMTKDECLQFTANALALAMER *                |   |       |    |               |
|                      |       |       |                                             | 3                     | 1.68  | 106   | YREDLMAGIIIAGWDPQEGGQVYVPMGGMMVR *      |   |       |    |               |
|                      |       |       |                                             | 3                     | 4.81  | 149   | SGSAADTQAVADAVTYQLGFHSIELNEPPLVHTAASLFK |   |       |    |               |
|                      |       |       |                                             | Psmb8<br>IPI00116712  | (β5i) | 22635 | 55                                      | 2 | -0.27 | 92 | ATAGSYISSLR   |
|                      |       |       |                                             |                       |       |       |                                         | 2 | 2.60  | 66 | LLSNMMLQYR    |
| 2                    | -0.68 | 72    | FQHGVIVAVDSR                                |                       |       |       |                                         |   |       |    |               |
| 2                    | -0.74 | 84    | VESSDVSDLLYK                                |                       |       |       |                                         |   |       |    |               |
| 2                    | 0.56  | 80    | GPGLYYVDDNGTR                               |                       |       |       |                                         |   |       |    |               |
| 2                    | 1.18  | 75    | DNYSGGVVNMYHMK                              |                       |       |       |                                         |   |       |    |               |
| 2                    | 1.35  | 99    | GMGLSMGSMICGWDK                             |                       |       |       |                                         |   |       |    |               |
| 2                    | -0.75 | 121   | LSGQMFSTGSGNTYAYGVMDSGYR                    |                       |       |       |                                         |   |       |    |               |
| 3                    | 0.81  | 60    | VIEINPYLLGTMSGCAADCQYWER                    |                       |       |       |                                         |   |       |    |               |
| Psmb5<br>IPI00317902 | (β5)  | 22514 | 18                                          |                       |       |       |                                         | 2 | 0.38  | 47 | VEEAYDLAR     |
|                      |       |       |                                             |                       |       |       |                                         | 2 | 0.91  | 56 | GPGLYYVDSEGNR |
| Psmb9<br>IPI00309379 | (β1i) | 21313 | 58                                          | 2                     | 0.21  | 56    | VSAGTAVVNR                              |   |       |    |               |
|                      |       |       |                                             | 2                     | -0.71 | 61    | VILGDELPK                               |   |       |    |               |
|                      |       |       |                                             | 2                     | -0.07 | 91    | FTTNAITLAMNR                            |   |       |    |               |
|                      |       |       |                                             | 2                     | 0.05  | 96    | DGSSGGVIYLVITITAAGVDHR                  |   |       |    |               |
|                      |       |       |                                             | 3                     | -0.15 | 99    | QPFTIGGSGSSYIYGYVDAAYKPGMTPEEER         |   |       |    |               |
| 3                    | -1.11 | 122   | IFCALSGSAADAQAIADMAAYQLELHGLELEEPPLVLAANVVK |                       |       |       |                                         |   |       |    |               |

**Table S2, related to Figure 2B.**

Protein name, mass of the active β subunit, % coverage of the protein by amino acids identified by LC-MS, charge of the peptide (z), measurement error (ppm), Mascot peptide scores, miss cleavage (\*), and C-terminal peptides (#). Mascot identifications were manually validated.

**Table S3, related to Figure 3C. Calculated exact ( $m/z$ ) masses of the active-site peptides bound to biotin-epoxomicin (probe 3)**

|            | $y_7$ ion sequence  | Exact mass |            | $z=2$      |            | $z=3$     |           |
|------------|---------------------|------------|------------|------------|------------|-----------|-----------|
|            |                     | mono-iso   | High-peak  | mono-iso   | High-peak  | mono-iso  | High-peak |
| $\beta 1$  | TTIMAVQFNGGVVLGADSR | 2659.40773 | 2660.41061 | 1330.71114 | 1331.21258 | 887.47652 | 887.81081 |
| $\beta 1i$ | TTIMAVEFDGGVVVGSDSR | 2663.35502 | 2664.35793 | 1332.68479 | 1333.18624 | 888.79228 | 889.12659 |
| $\beta 2$  | TTIAGVVYK           | 1674.96302 | 1674.96302 | 838.48878  | 838.48878  | 559.32828 | 559.32828 |
| $\beta 2i$ | TTIAGLVFR           | 1700.98990 | 1700.98990 | 851.50223  | 851.50223  | 568.00391 | 568.00391 |
| $\beta 5$  | TTTLAFK             | 1504.85749 | 1504.85749 | 753.43602  | 753.43602  | 502.64644 | 502.64644 |
| $\beta 5i$ | TTTLAFK             | 1504.85749 | 1504.85749 | 753.43602  | 753.43602  | 502.64644 | 502.64644 |
| $\beta 5t$ | TTTLAFR             | 1532.86364 | 1532.86364 | 767.43909  | 767.43909  | 511.96182 | 511.96182 |

**Table S3, related to Figure 3C.**

The mono-isotopic mass (mono-iso) and the mass of the most abundant isotope peak (High-peak) are shown at charge ( $z$ ) of 0, 2, and 3. The active site peptide sequence of  $\beta 5$  and  $\beta 5i$  is identical.

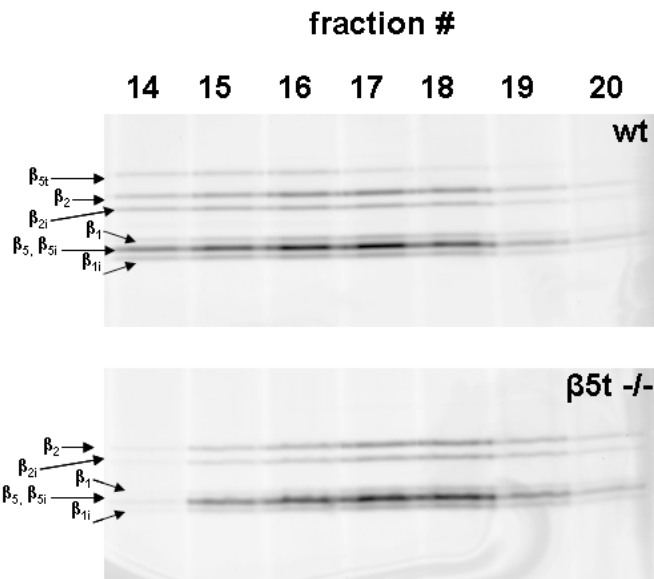

**Figure S2.**

Lysates from wild type and  $\beta 5t^{-/-}$  thymi from 3 weeks old mice were fractionated on 10-40% sucrose gradients by ultra-centrifugation. The (thymo)proteasome activity was assayed by ABP profiling with probe 4.

**Figure S3.**

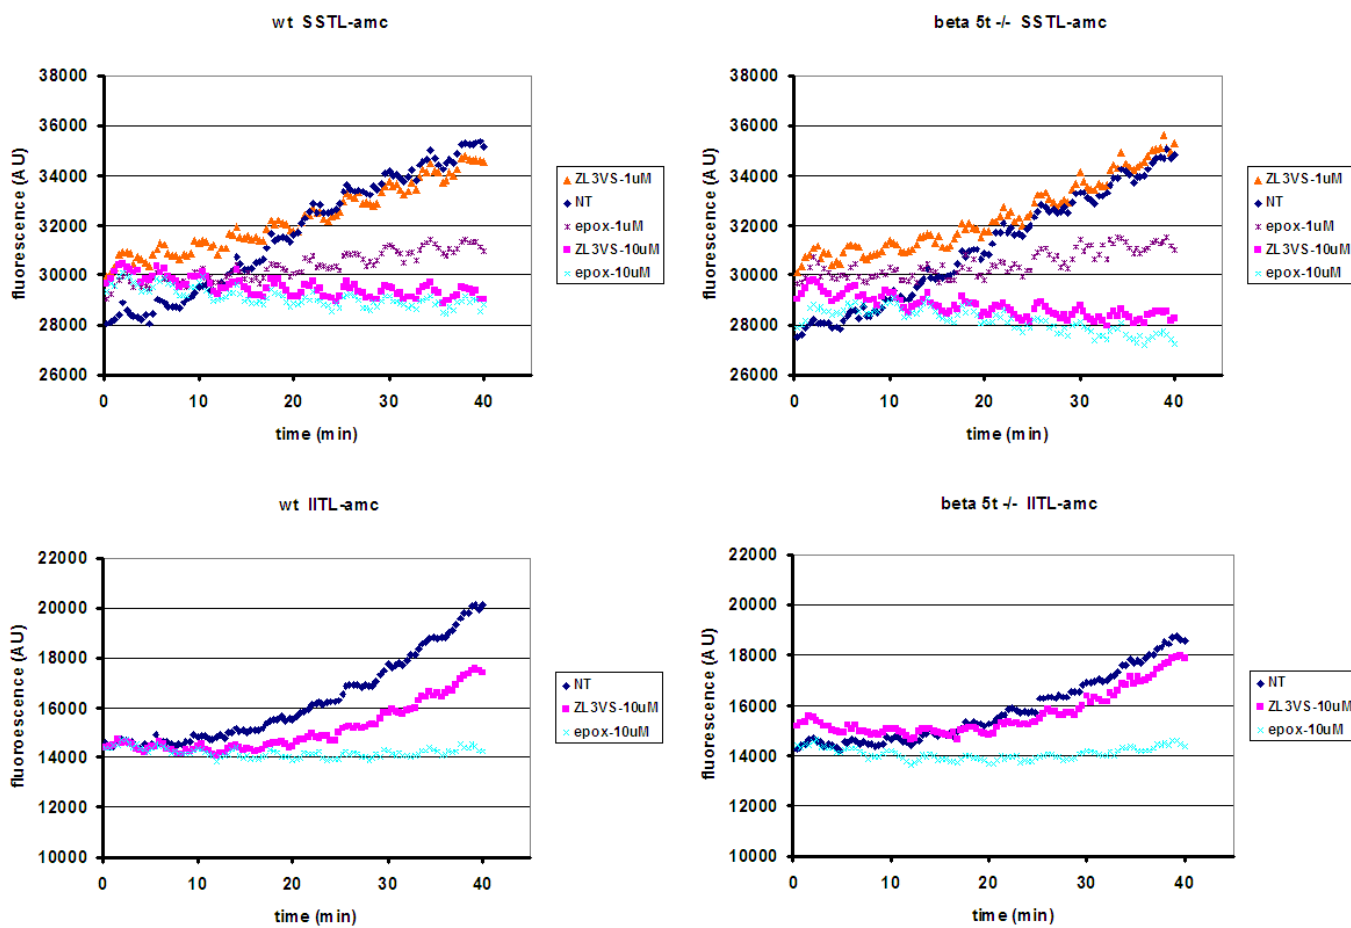

**Figure S3.**

Fluorogenic assay of enriched wt and  $\beta 5t^{-/-}$  thymoproteasomes using the Ac-SSSL-amic and Ac-IITL-amic substrates in combination with inhibition with 1, 10  $\mu\text{M}$  ZL<sub>3</sub>VS or epoxomicin.

## SUPPLEMENTAL EXPERIMENTAL PROCEDURES

### Synthesis of the Activity-Based Probes 2, 3 and 4

#### Fmoc-Ile-Thr(*t*Bu)-OMe

L-threonine(*t*Bu) methyl ester HCl salt (2.5 g, 11 mmol) was dissolved in DCM (60 mL). To this solution were added Fmoc-L-isoleucine (4.7 g, 13.3 mmol, 1.2 equiv.), HCTU (5.5 g, 13.3 mmol, 1.2 equiv.) and DiPEA (6.0 mL, 36 mmol, 3.3 equiv.). The mixture was stirred for 2 hours after which TLC analysis indicated a completed reaction. The mixture was concentrated *in vacuo*, dissolved in EtOAc

and extracted with 1 M HCl (2×), saturated NaHCO<sub>3</sub> (2×) and brine. The organic layer was dried (MgSO<sub>4</sub>) and concentrated under reduced pressure. Purification of the product by column chromatography (10% → 15% EtOAc/petroleum ether) gave the title compound as a colorless solid (yield: 5.16 g, 9.83 mmol, 89%). <sup>1</sup>H NMR (400 MHz, CDCl<sub>3</sub>) δ = 7.76 (d, *J* = 7.48 Hz, 2H), 7.60 (d, *J* = 7.41 Hz, 2H), 7.39 (t, *J* = 7.46, 7.46 Hz, 2H), 7.31 (dt, *J* = 7.43, 7.43, 0.98 Hz, 2H), 6.48 (d, *J* = 8.84 Hz, 1H), 5.58 (d, *J* = 8.70 Hz, 1H), 4.49 (dd, *J* = 9.00, 1.68 Hz, 1H), 4.44-4.33 (m, 2H), 4.28-4.15 (m, 3H), 3.71 (s, 3H), 1.94-1.83 (m, 1H), 1.65-1.53 (m, 1H), 1.33-1.21 (m, 1H), 1.17 (d, *J* = 6.27 Hz, 3H), 1.11 (s, 9H), 1.03-0.93 (m, 6H) ppm. <sup>13</sup>C NMR (100 MHz, CDCl<sub>3</sub>) δ = 171.426, 170.868, 156.074, 143.910, 143.784, 141.249, 127.635, 127.017, 125.077, 119.904, 74.215, 67.193, 66.969, 59.307, 57.832, 52.135, 47.173, 38.179, 28.272, 24.820, 21.046, 15.085, 11.521 ppm.

### **Boc-Ile-Ile-Thr(*t*Bu)-NHNH<sub>2</sub>**

Fmoc-Ile-Thr(*t*Bu)-OMe (5.16 g, 9.83 mmol) was dissolved in DMF (50 mL) and DBU (1.57 mL, 10.3 mmol, 1.05 equiv.) was added. The reaction was stirred for 5 minutes after which TLC analysis showed complete removal of the Fmoc group. Next, HOBt (1.98 g, 14.7 mmol, 1.5 equiv.) was added and the reaction mixture was stirred for another 30 minutes. To this mixture were added Boc-L-isoleucine (2.73 g, 11.8 mmol, 1.2 equiv.), HCTU (4.88 g, 11.8 mmol, 1.2 equiv.) and DiPEA (4.87 mL, 29.5 mmol, 3 equiv.). The mixture was stirred for 16 hours after which TLC analysis indicated a completed reaction. The mixture was concentrated *in vacuo*, dissolved in DCM and extracted with 1 M HCl (2×), saturated NaHCO<sub>3</sub> (2×) and brine. The organic layer was dried (MgSO<sub>4</sub>) and concentrated under reduced pressure. Purification of the product by column chromatography (10% → 50% EtOAc/petroleum ether) gave Boc-Ile-Ile-Thr(*t*Bu)-OMe as a colorless solid (yield: 3.69 g, 7.15 mmol, 73%). LC-MS: gradient 10% → 90% ACN/(0.1% TFA/H<sub>2</sub>O): R<sub>t</sub> (min): 9.88 (ESI-MS (m/z): 516.13 (M + H<sup>+</sup>)). The obtained product was dissolved in MeOH (50 mL) and hydrazine hydrate (10.4 mL, 214.5 mmol, 30 equiv.) was added. The reaction mixture was refluxed for 16 hours after which TLC analysis indicated complete conversion. Toluene was added and the mixture was concentrated under reduced pressure. Traces of hydrazine were removed by co-evaporating the mixture with toluene (3×) and the title compound was obtained as a colorless solid (yield: 6.67 g, 7.15 mmol, quant.). <sup>1</sup>H NMR (400 MHz, MeOD) δ = 4.36 (d, *J* = 3.53 Hz, 1H), 4.32 (d, *J* = 8.12 Hz, 1H), 4.07-4.00 (m, 1H), 3.94 (d, *J* = 7.90 Hz, 1H), 1.93-1.84 (m, 1H), 1.83-1.73 (m, 1H), 1.61-1.50 (m, 2H), 1.44 (s, 9H), 1.19 (s, 9H), 1.19-1.16 (m, 2H), 1.10 (d, *J* = 6.32 Hz, 3H), 0.94-0.87 (m, 12H) ppm. <sup>13</sup>C NMR (100 MHz, MeOD) δ = 174.839, 173.393, 171.301, 157.910, 80.568, 75.849, 68.522, 60.624, 59.227, 58.566, 37.949, 37.852, 28.772, 28.668, 25.941, 19.781, 16.231, 15.951, 11.392, 11.325 ppm. LC-MS: gradient 10% → 90% ACN/(0.1% TFA/H<sub>2</sub>O): R<sub>t</sub> (min): 6.08 (ESI-MS (m/z): 516.4 (M + H<sup>+</sup>)).

### **Boc-Ile-Ile-Thr(*t*Bu)-leucinyI-(*R*)-2-methyloxirane**

Boc-Ile-Ile-Thr(*t*Bu)-NHNH<sub>2</sub> (2.0 g, 3.87 mmol) was dissolved in DCM (40 mL) and cooled to -30 °C under an argon atmosphere. *t*BuONO (566 μL, 4.25 mmol, 1.1 equiv.) and HCl (2.8 equiv., 10.8 mmol, 2.7 mL of a 4 M solution in 1,4-dioxane) were added and the mixture was stirred at -30 °C for 3 hours. (Boc-leucinyI)-(*R*)-2-methyloxirane (1.16 g, 4.25 mmol, 1.1 equiv.) was deprotected

with DCM/TFA (1:1 v/v, 20 mL) for 30 minutes followed by co-evaporation with toluene (3×). The resulting TFA salt was dissolved in DMF (5 mL) and added to the former reaction mixture together with DiPEA (3.31 mL, 20 mmol, 5 equiv.). The reaction mixture was slowly warmed to ambient temperature and stirred for 16 hours. Next, the mixture was extracted with 1 M HCl (2×), H<sub>2</sub>O and brine, dried (MgSO<sub>4</sub>) and concentrated *in vacuo*. The title compound was obtained after column chromatography (20% → 50% EtOAc/petroleum ether) as a colorless solid (yield: 2.25 g, 3.43 mmol, 89%). <sup>1</sup>H NMR (400 MHz, CDCl<sub>3</sub>) δ = 7.64 (d, *J* = 7.47 Hz, 1H), 6.99 (d, *J* = 5.64 Hz, 1H), 6.45 (d, *J* = 8.20 Hz, 1H), 5.22 (d, *J* = 7.85 Hz, 1H), 4.46 (ddd, *J* = 10.45, 7.55, 2.94 Hz, 1H), 4.40-4.32 (m, 2H), 4.14-4.07 (m, 1H), 3.94 (t, *J* = 7.34, 7.34 Hz, 1H), 3.38 (d, *J* = 5.07 Hz, 1H), 2.89 (d, *J* = 5.06 Hz, 1H), 1.93-1.77 (m, 2H), 1.74-1.64 (m, 1H), 1.60-1.55 (m, 1H), 1.52 (s, 3H), 1.51-1.46 (m, 2H), 1.44 (s, 9H), 1.28 (s, 9H), 1.27-1.24 (m, 1H), 1.17-1.08 (m, 2H), 1.06 (d, *J* = 6.44 Hz, 3H), 0.96 (d, *J* = 6.54 Hz, 6H), 0.92-0.86 (m, 12H) ppm. <sup>13</sup>C NMR (100 MHz, CDCl<sub>3</sub>) δ = 208.062, 171.593, 170.738, 169.515, 155.807, 79.761, 75.492, 66.143, 59.249, 57.686, 56.956, 52.395, 50.746, 39.809, 37.300, 36.971, 28.280, 28.082, 25.423, 24.879, 24.695, 23.358, 21.359, 16.754, 15.532, 15.405, 11.285 ppm. LC-MS: gradient 10% → 90% ACN/(0.1% TFA/H<sub>2</sub>O): R<sub>t</sub> (min): 11.31 (ESI-MS (m/z): 655.27 (M + H<sup>+</sup>)).

### Biotin-epoxomicin (3)

Boc-Ile-Ile-Thr(*t*Bu)-leuciny-(*R*)-2-methyloxirane (13.2 mg, 20.2 μmol) was dissolved in 2 mL DCM. TFA (2 mL) was added and the mixture was stirred for 20 min. The reaction mixture was co-evaporated with toluene (3×). The residue was dissolved in 1 mL DMF. Biotin-OSu (7 mg, 21 μmol, 1.01 equiv.) and DiPEA (8.3 μL, 50 μmol, 2.5 equiv.) were added and the mixture was stirred for 2 hr. The volatiles were removed *in vacuo* and the title compound was obtained after HPLC purification (yield: 5 mg, 6.9 μmol, 34%). <sup>1</sup>H NMR (400 MHz, MeOD) δ = 4.55 (dd, *J* = 10.63, 3.03 Hz, 1H), 4.48 (dd, *J* = 7.72, 4.85 Hz, 1H), 4.32-4.20 (m, 4H), 4.06-3.99 (m, 2H), 3.25 (d, *J* = 5.07 Hz, 1H), 3.23-3.16 (m, 1H), 2.95-2.89 (m, 2H), 2.69 (d, *J* = 12.71 Hz, 1H), 2.33-2.20 (m, 2H), 1.90-1.77 (m, 2H), 1.78-1.30 (m, 13H), 1.24-1.11 (m, 5H), 0.95-0.86 (m, 18H) ppm. LC-MS: gradient 10% → 90% ACN/(0.1% TFA/H<sub>2</sub>O): R<sub>t</sub> (min): 6.30 (ESI-MS (m/z): 725.7 (M + H<sup>+</sup>)).

### Azido-BODIPY(Tmr)-epoxomicin

Boc-Ile-Ile-Thr(*t*Bu)-leuciny-(*R*)-2-methyloxirane (7.9 mg, 12 μmol) was dissolved in TFA (1 mL) and stirred for 30 min., before being coevaporated with toluene (3×). The residue was dissolved in DMF (2 mL) and azido-BODIPY-OSu (6.6 mg, 12 μmol, 1 equiv.) and DiPEA (8 μL, 48 μmol, 4 equiv.) were added and the reaction mixture was stirred for 12 hr. Concentration *in vacuo*, followed by purification by column chromatography (DCM → 2% MeOH/DCM) yielded the title compound as a brown/red solid (yield: 5.4 mg, 5.7 μmol, 47%). <sup>1</sup>H NMR (600 MHz, MeOD) δ = 7.88 (d, *J* = 8.7 Hz, 2H), 7.41 (s, 1H), 7.06 (d, *J* = 3.9 Hz, 1H), 6.99 (d, *J* = 8.7 Hz, 2H), 6.60 (d, *J* = 3.9 Hz, 1H), 4.55 (dd, *J*<sub>1</sub> = 10.7, *J*<sub>2</sub> = 2.8 Hz, 1H), 4.30 (d, *J* = 5.0 Hz, 1H), 4.22 (d, *J* = 7.8 Hz, 1H), 4.15-4.12 (m, 3H), 4.02 (p, *J* = 6.1 Hz, 1H), 3.54 (t, *J* = 6.7 Hz, 2H), 3.25 (d, *J* = 5.1 Hz, 1H), 2.92 (d, *J* = 5.1 Hz, 1H), 2.81 (m, 1H), 2.71 (m, 1H), 2.51 (s, 3H), 2.45-2.40 (m, 2H), 2.25 (s, 3H), 2.07 (p, *J* = 6.3 Hz, 2H), 1.89-1.79 (m, 1H), 1.75-1.66 (m, 2H), 1.65-1.52 (m, 2H), 1.53-1.41 (m, 5H), 1.41-1.21 (m, 15H), 1.20-1.06 (m, 5H), 1.05-0.97 (m, 1H), 0.97-0.85 (m, 16H), 0.82 (d, *J* = 6.7 Hz, 3H), 0.76 (t, *J* = 7.4 Hz, 3H) ppm. <sup>13</sup>C

NMR (150 MHz, MeOD)  $\delta$  = 209.51, 174.86, 174.06, 173.59, 172.23, 161.03, 160.67, 156.57, 141.79, 136.67, 135.83, 132.45, 131.92, 131.89, 131.86, 131.67, 131.65, 129.91, 129.28, 127.16, 124.70, 119.10, 115.27, 115.19, 69.14, 68.55, 65.98, 60.13, 59.82, 59.42, 59.41, 53.10, 51.84, 40.38, 38.02, 37.71, 36.45, 30.82, 29.90, 26.26, 26.03, 23.81, 21.52, 21.21, 20.02, 17.05, 15.92, 15.86, 11.47, 11.22, 9.67 ppm.

#### **Biotin-BODIPY(Tmr)-epoxomicin (2)**

Azido-BODIPY(Tmr)-epoxomicin (4.1 mg, 4.3  $\mu$ mol) and Biotin-propargylamide (2.4 mg, 8.6  $\mu$ mol, 2 equiv.) were dissolved in *t*BuOH (0.25 mL) and toluene (0.25 mL) before CuSO<sub>4</sub> (125  $\mu$ L 3.4 mM, 10 mol%) and sodium ascorbate (125  $\mu$ L 6.9 mM, 20 mol%) were added. The reaction mixture was stirred at 80 °C for 12 hr., before being cooled to room temperature and concentrated *in vacuo*. Purification by column chromatography (petroleum ether  $\rightarrow$  50% acetone/petroleum ether) yielded the title compound as a brown/red solid (4.5 mg, 3.7  $\mu$ mol, 85%).  $\lambda_{\max}$  (MeOH): 544.43 nm,  $\epsilon$ : 60400 l mol<sup>-1</sup>cm<sup>-1</sup>. <sup>1</sup>H NMR (600 MHz, MeOD)  $\delta$  = 7.95-7.78 (m, 3H), 7.42 (s, 1H), 7.07 (d,  $J$  = 4.1 Hz, 1H), 6.95 (d,  $J$  = 8.9 Hz, 2H), 6.61 (d,  $J$  = 4.1 Hz, 1H), 4.70-4.52 (m, 5H), 4.46-4.39 (m, 2H), 4.34-4.26 (m, 1H), 4.25-4.19 (m, 1H), 4.17-4.11 (m, 1H), 4.08-3.99 (m, 3H), 3.95 (t,  $J$  = 2.2 Hz, 1H), 3.25 (d,  $J$  = 5.0 Hz, 1H), 3.16-3.10 (m, 1H), 2.92 (d,  $J$  = 5.1 Hz, 1H), 2.71-2.64 (m, 2H), 2.60-2.56 (m, 1H), 2.51 (s, 3H), 2.46-2.37 (m, 4H), 2.26 (s, 3H), 2.24-2.17 (m, 2H), 1.95-1.21 (m, 32H), 1.21-1.10 (m, 5H), 1.06-0.85 (m, 17H), 0.82 (d,  $J$  = 6.8 Hz, 3H), 0.76 (t,  $J$  = 7.3 Hz, 3H) ppm. ESI-MS ( $m/z$ ): 1229.64 (M + H<sup>+</sup>).

#### **BODIPY(Tmr)-epoxomicin (4)**

Boc-Ile-Ile-Thr(*t*Bu)-leucinyI-(*R*)-2-methyloxirane (65 mg, 100  $\mu$ mol) was dissolved in 2 mL TFA and the solution was stirred for 1 hr. before being coevaporated with toluene (3x). The residue was dissolved in DCM:DMF (1/1, v/v, 10 mL) and DiPEA was added (300  $\mu$ mol, 50  $\mu$ L, 3 equiv.) followed by BODIPY(Tmr)-OSu (50 mg, 100  $\mu$ mol, 1 equiv.) and the reaction mixture was stirred for 12 hr. The solution was concentrated and applied to column chromatography (0-2% MeOH:DCM, then 0-2% EtOH:DCM, 2x) to yield the title compound as a purple solid (17 mg, 19  $\mu$ mol, 19%). <sup>1</sup>H NMR (400 MHz, CDCl<sub>3</sub>)  $\delta$  = 8.71-8.57 (m, 1H), 8.17-7.91 (m, 2H), 7.87 (d,  $J$  = 8.81 Hz, 2H), 7.53-7.37 (m, 1H), 6.98 (d,  $J$  = 8.88 Hz, 2H), 6.84 (s, 1H), 6.74 (d,  $J$  = 3.76 Hz, 1H), 6.40 (d,  $J$  = 3.94 Hz, 1H), 4.86-4.68 (m, 3H), 4.63-4.56 (m, 1H), 4.09-3.99 (m, 1H), 3.86 (s, 3H), 3.26 (d,  $J$  = 4.46 Hz, 1H), 2.88 (d,  $J$  = 4.62 Hz, 1H), 2.73-2.56 (m, 1H), 2.56-2.31 (m, 6H), 2.01 (s, 3H), 1.87-1.73 (m, 99H), 1.51 (s, 3H), 1.09 (d,  $J$  = 6.12 Hz, 3H), 0.92-0.73 (m, 21H). <sup>13</sup>C NMR (150 MHz, CDCl<sub>3</sub>)  $\delta$  = 208.16, 172.24, 171.91, 171.74, 170.71, 160.28, 158.28, 155.25, 139.29, 135.04, 134.05, 130.59, 130.15, 128.08, 125.52, 122.75, 118.10, 113.70, 67.32, 59.13, 57.49, 57.24, 56.92, 55.24, 52.35, 50.74, 39.36, 38.24, 37.55, 35.69, 29.68, 25.32, 25.28, 25.05, 23.23, 22.67, 21.25, 19.79, 17.42, 16.83, 15.30, 15.16, 14.11, 12.95, 11.48, 11.44, 9.34. LC-MS: gradient 10%  $\rightarrow$  90% ACN/(0.1% TFA/H<sub>2</sub>O): R<sub>t</sub> (min): 10.21 (ESI-MS ( $m/z$ ): 879.00 (M + H<sup>+</sup>)).



## Synthesis of the fluorogenic substrates

### Boc-Leu-AMC

Boc-Leu-OH · H<sub>2</sub>O (0.62 mmol, 155 mg, 1.1 equiv.) was coevaporated with toluene (2x) and dissolved in DMF. HATU (0.67 mmol, 255 mg, 1.2 equiv.) and 2,4,6-trimethylpyridine (0.67 mmol, 90 µL, 1.2 equiv.) were added and the mixture was stirred for 5 min. AMC (0.56 mmol, 100 mg, 1 equiv.) was added and the mixture was stirred for 5 days. The mixture was concentrated, dissolved in DCM and extracted with 1M HCl (2x), sat. aq. NaHCO<sub>3</sub> (2x) and brine before drying over Na<sub>2</sub>SO<sub>4</sub>. Column chromatography (20% EA:PE → 50% EA:PE) yielded the title compound (0.51 mmol, 200 mg, 92%). <sup>1</sup>H NMR (400 MHz, CDCl<sub>3</sub>) δ ppm 9.70 (s, 1H), 7.80 (s, 1H), 7.35 (d, *J* = 8.55 Hz, 1H), 6.99 (d, *J* = 8.17 Hz, 1H), 6.06 (s, 1H), 5.59 (d, *J* = 7.82 Hz, 1H), 4.53-4.42 (m, 1H), 2.34 (s, 3H), 1.89-1.58 (m, 3H), 1.50 (s, 9H), 1.01-0.92 (m, 6H). <sup>13</sup>C NMR (100 MHz, CDCl<sub>3</sub>) δ ppm 172.28, 160.95, 156.69, 153.58, 152.43, 141.36, 124.53, 115.20, 115.09, 112.74, 106.88, 80.51, 54.04, 40.72, 28.31, 28.18, 24.62, 23.06, 21.13, 18.26.

### Fmoc-Ser(tBu)-Thr(tu)OMe

HCl·H-Thr(tBu)OMe (1 mmol, 383 mg, 1 equiv.), FmocSer(tBu)OH (1.05 mmol, 237 mg, 1.05 equiv.) and HBTU (1.2 mmol, 455 mg, 1.2 equiv.) were dissolved in DCM (10 mL) and DiPEA (3.5 mmol, 578 µL, 3.5 equiv.) was added and the mixture was stirred for 1h. The mixture was concentrated, dissolved in EA and washed with 1M HCl (2x), sat. aq. NaHCO<sub>3</sub> (4x) and brine, dried over Na<sub>2</sub>SO<sub>4</sub> and concentrated to yield the title compound (560 mg, 1 mmol, quant) which was used without further purification. <sup>1</sup>H NMR (400 MHz, CDCl<sub>3</sub>) δ ppm 7.74 (d, *J* = 7.50 Hz, 2H), 7.65-7.58 (m, 3H), 7.38 (t, *J* = 7.44, Hz, 2H), 7.30 (dt, *J* = 7.44, 1.00 Hz, 2H), 5.92 (d, *J* = 5.73 Hz, 1H), 4.54 (d, *J* = 9.07 Hz, 1H), 4.40-4.34 (m, 3H), 4.29-4.19 (m, 2H), 3.83 (dd, *J* = 8.21, 3.80 Hz, 1H), 3.70 (s, 3H), 3.47 (t, *J* = 8.56, 1H), 1.29-1.24 (m, 9H), 1.18 (d, *J* = 6.25 Hz, 3H), 1.12-1.11 (m, 9H). <sup>13</sup>C NMR (100 MHz, CDCl<sub>3</sub>) δ ppm 170.91, 170.66, 155.85, 143.79, 143.62, 141.10, 127.53, 126.90, 125.03, 119.80, 74.14, 73.97, 67.22, 66.94, 61.69, 58.13, 53.91, 51.90, 46.98, 28.27, 27.24, 20.66.

### Fmoc-(Ser(tBu))<sub>2</sub>-Thr(tBu)OMe

Fmoc-Ser(tBu)Thr(tu)OMe (1 mmol) was dissolved in DMF (10 mL). DBU (1 mmol, 152 µmol, 150 µL) was added and the mixture was stirred for 5 min before HOBt (2 mmol, 270 mg, 2 equiv.) was added, After 5 min of stirring, Fmoc-Ser(tBu)OH (1.05 mmol, 403 mg, 1.05 equiv.), HBTU (1.20 mmol, 455 mg, 1.2 equiv.) and DiPEA (4.5 mmol, 743 µL, 4.5 equiv.) were added and the mixture was stirred for 1 hr before being concentrated. The residue was taken up in DCM and washed with 1M HCl (2x), sat. aq. NaHCO<sub>3</sub> (4x) and brine, dried over Na<sub>2</sub>SO<sub>4</sub> and concentrated. Column chromatography (10% EA/tol → 25% EA/tol) yielded the title compound (548 mg, 785 µmol, 79%). <sup>1</sup>H NMR (400 MHz, CDCl<sub>3</sub>) δ ppm 7.77-7.67 (m, 2H), 7.63-7.57 (m, 1H), 7.43 (d, *J* = 9.18 Hz, 1H), 7.37 (t, *J* = 7.45 Hz, 2H), 7.29 (t, *J* = 7.42 Hz, 2H), 7.25-7.19 (m, 2H), 5.90 (d, *J* = 6.24 Hz, 1H), 4.60-4.50 (m, 2H), 4.43-4.26 (m, 3H), 4.24-4.18 (m, 2H), 3.84 (m, 2H), 3.44 (m 2H), 3.67 (s, 3H), 1.27-1.24 (m, 9H), 1.25-1.22 (m, 9H), 1.15 (d, *J* = 5.82 Hz, 3H), 1.10 (s, 9H). <sup>13</sup>C NMR (100 MHz, CDCl<sub>3</sub>) δ ppm 170.60, 170.43, 170.05, 155.78, 143.72, 143.53, 141.03, 127.46, 126.84, 124.96, 119.72, 74.13, 73.97,

73.83, 67.25, 66.91, 61.70, 61.05, 57.95, 54.35, 53.11, 51.76, 46.90, 28.21, 27.19, 20.44.

### **Ac-(Ser(tBu))<sub>2</sub>-Thr(tBu)OMe**

Fmoc-(Ser(tBu))<sub>2</sub>Thr(tBu)OMe (548 mg, 785 μmol) was dissolved in DMF (10 mL). DBU (785 μmol, 117 μL, 1 equiv.) was added and the mixture was stirred for 5 min before HOBt (1.18 mmol, 159 mg, 1.5 equiv.) was added. The mixture was stirred for 5 min and Ac<sub>2</sub>O (1.18 mmol, 111 μL, 1.5 equiv.) and DiPEA (1.96 mmol, 324 μL, 2.5 equiv.) were added and the mixture was stirred for 30 min before being concentrated. The residue was taken up in DCM and washed with 1M HCl (2x), sat. aq. NaHCO<sub>3</sub> (2x) and dried over Na<sub>2</sub>SO<sub>4</sub>. Column chromatography (20% EA/tol → EA and 50% EA/tol → tol) yielded the title compound (isolated yield 226 mg, 437 μmol, 56%). <sup>1</sup>H NMR (400 MHz, CDCl<sub>3</sub>) δ ppm 7.64 (d, *J* = 6.31 Hz, 1H), 7.39 (d, *J* = 9.33 Hz, 1H), 6.53 (d, *J* = 6.40 Hz, 1H), 4.57-4.44 (m, 3H), 4.24 (dq, *J* = 6.15, 2.00 Hz, 1H), 3.86-3.78 (m, 2H), 3.70 (s, 3H), 3.44-3.35 (m, 2H), 2.04 (s, 3H), 1.27-1.24 (m, 9H), 1.23 (s, 9H), 1.16 (d, *J* = 6.25 Hz, 3H), 1.12 (s, 9H). <sup>13</sup>C NMR (100 MHz, CDCl<sub>3</sub>) δ ppm 170.79, 170.55, 170.37, 169.93, 74.35, 74.13, 74.02, 67.43, 61.40, 61.18, 58.08, 53.28, 53.07, 51.96, 28.39, 27.34, 23.19, 20.59.

### **Ac-(Ser(tBu))<sub>2</sub>-Thr(tBu)NHNH<sub>2</sub>**

Ac-(Ser(tBu))<sub>2</sub>Thr(tBu)OMe (126 μmol, 65 mg) was dissolved in MeOH (5 mL) and hydrazine monohydrate was added (7.6 mmol, 0.4 mL, 60 equiv.) and the mixture was refluxed for 24h. More hydrazine (1.9 mmol, 0.1 mL, 15 equiv.) was added and the mixture was refluxed for 16 h. The mixture was coevaporated with toluene (3x) and used without further purification. <sup>1</sup>H NMR (400 MHz, CD<sub>3</sub>OD) δ ppm 4.53-4.42 (m, 2H), 4.32-4.27 (m, 1H), 4.21-4.15 (m, 1H), 3.78 (dd, *J* = 9.18, 4.07 Hz, 1H), 3.68-3.60 (m, 2H), 3.58-3.50 (m, 1H), 2.02 (s, 3H), 1.23 (s, 9H), 1.22 (s, 9H), 1.17 (s, 9H), 1.19 (d, *J* = 1.71 Hz, 3H). <sup>13</sup>C NMR (100 MHz, CD<sub>3</sub>OD) δ ppm 173.40, 172.75, 172.30, 171.36, 75.63, 75.44, 75.11, 68.01, 62.65, 59.43, 55.35, 55.29, 28.72, 27.76, 27.73, 22.50, 20.47.

### **Fmoc-Ile-Thr(tBu)OMe**

HCl·H-Thr(tBu)OMe (2 mmol, 707 mg, 1 equiv.), Fmoc-Ile-OH (2 mmol, 451 mg, 1 equiv.) and HBTU (2.4 mmol, 910 mg, 1.2 equiv.) were dissolved in DCM (40 mL). DiPEA (7 mmol, 1.16 mL, 3.5 equiv.) was added and the mixture was stirred for 90 min. The mixture was concentrated, dissolved in EA and washed with 1M HCl (2x), sat. aq. NaHCO<sub>3</sub> (4x) and brine, dried over Na<sub>2</sub>SO<sub>4</sub> and concentrated. Column chromatography (10% EA/tol → 25% EA/tol) yielded the title compound (1.05 g, 2 mmol, quant) which was used without further purification. <sup>1</sup>H NMR (400 MHz, CDCl<sub>3</sub>) δ ppm 7.76 (d, *J* = 7.46 Hz, 2H), 7.60 (d, *J* = 7.43 Hz, 2H), 7.39 (t, *J* = 7.45 Hz, 2H), 7.30 (dt, *J* = 7.44, 0.95 Hz, 2H), 6.44 (d, *J* = 8.89 Hz, 1H), 5.57 (d, *J* = 8.70 Hz, 1H), 4.49 (dd, *J* = 8.99, 1.67 Hz, 1H), 4.45-4.32 (m, 2H), 4.27-4.16 (m, 3H), 3.70 (s, 3H), 1.95-1.83 (m, 1H), 1.65-1.54 (m, 1H), 1.36-1.20 (m, 1H), 1.17 (d, *J* = 6.27 Hz, 3H), 1.11 (s, 9H), 1.03-0.94 (m, 6H). <sup>13</sup>C NMR (100 MHz, CDCl<sub>3</sub>) δ ppm 171.34, 170.86, 156.02, 143.88, 143.75, 141.21, 127.61, 126.99, 125.10, 125.06, 119.88, 74.14, 67.11, 66.93, 59.25, 57.80, 52.12, 47.13, 38.20, 28.24, 24.80, 21.04, 15.05, 11.52.

### **H-Ile-Thr(tBu)OMe**

Fmoc-IleThr(tBu)OMe (576  $\mu\text{mol}$ , 302 mg) was dissolved in THF (10 mL). EtSH (5.76 mmol, 430  $\mu\text{L}$ , 10 equiv.) was added, followed by DBU (one drop) and the mixture was stirred for 1hr before being concentrated. Column chromatography (50% EA:Tol  $\rightarrow$  EA) yielded the title compound (509  $\mu\text{mol}$ , 154 mg, 88%).  $^1\text{H}$  NMR (400 MHz,  $\text{CDCl}_3$ )  $\delta$  ppm 7.72 (d,  $J = 9.20$  Hz, 1H), 4.48 (dd,  $J = 9.20, 2.00$  Hz, 1H), 4.26-4.22 (m, 1H), 3.71 (s, 3H), 3.35 (d,  $J = 4$  Hz, 1H), 2.00-1.89 (m, 1H), 1.87 (br s, 2H), 1.51-1.49 (m, 1H), 1.25-1.20 (m, 1H), 1.24 (d,  $J = 6.30$  Hz, 3H), 1.12 (s, 9H), 0.99 (d, 6.80 Hz, 3H), 0.94 (t,  $J = 2$  Hz, 3H).  $^{13}\text{C}$  NMR (100 MHz,  $\text{CDCl}_3$ )  $\delta$  ppm 174.81, 171.22, 73.73, 67.12, 59.85, 57.42, 51.86, 37.99, 28.12, 23.76, 20.84, 15.80, 11.66.

### Fmoc-Ile<sub>2</sub>-Thr(tBu)OMe

H-IleThr(tBu)OMe (509  $\mu\text{mol}$ , 154 mg) was dissolved in DCM. Fmoc-Ile-OH (534  $\mu\text{mol}$ , 189 mg, 1.05 equiv.), HBTU (585  $\mu\text{mol}$ , 222 mg, 1.15 equiv.) and DiPEA (1.27 mmol, 210  $\mu\text{L}$ , 2.5 equiv.) were added and the mixture was stirred for 30 min. The mixture was washed with 1M HCl (2x), sat. aq.  $\text{NaHCO}_3$  (4x) and brine, dried over  $\text{Na}_2\text{SO}_4$  and concentrated. Column chromatography (10% EA/tol  $\rightarrow$  50% EA/tol) yielded the title compound (320 mg, 502  $\mu\text{mol}$ , 99%).  $^1\text{H}$  NMR (400 MHz,  $\text{CDCl}_3$ )  $\delta$  ppm 7.72 (d,  $J = 7.50$  Hz, 2H), 7.64-7.56 (m, 2H), 7.39-7.31 (m, 3H), 7.29-7.20 (m, 2H), 6.84 (d,  $J = 9.13$  Hz, 1H), 6.01 (d,  $J = 9.27$  Hz, 1H), 4.61-4.51 (m, 2H), 4.46 (dd,  $J = 10.30, 7.08$  Hz, 1H), 4.34-4.22 (m, 2H), 4.22-4.14 (m, 2H), 3.63 (s, 3H), 1.91-1.76 (m, 2H), 1.65-1.51 (m, 2H), 1.29-1.12 (m, 2H), 1.10 (d,  $J = 6.23$  Hz, 3H), 1.07 (s, 9H), 0.96 (d,  $J = 6.75$  Hz, 3H), 0.92-0.83 (m, 9H).  $^{13}\text{C}$  NMR (100 MHz,  $\text{CDCl}_3$ )  $\delta$  ppm 171.41, 171.29, 170.71, 156.15, 143.83, 143.77, 141.08, 127.44, 126.84, 125.13, 125.09, 119.71, 73.89, 67.12, 66.85, 59.23, 57.57, 57.38, 51.85, 47.00, 37.94, 37.61, 28.13, 24.90, 24.76, 20.50, 15.17, 14.91, 11.28.

### H-Ile<sub>2</sub>-Thr(tBu)OMe

Fmoc-Ile<sub>2</sub>Thr(tBu)OMe (320 mg, 502  $\mu\text{mol}$ ) was dissolved in THF (10 mL) and EtSH (5.02  $\mu\text{mol}$ , 370  $\mu\text{L}$ , 10 equiv.) was added followed by DBU (1 drop) and the mixture was stirred for 1h before being concentrated. Column chromatography (50% EA/Tol  $\rightarrow$  5% MeOH:EA) yielded the title compound (168 mg, 404  $\mu\text{mol}$ , 81%).  $^1\text{H}$  NMR (400 MHz,  $\text{CDCl}_3$ )  $\delta$  ppm 7.86 (d,  $J = 8.78$  Hz, 1H), 6.51 (d,  $J = 8.89$  Hz, 1H), 4.46 (dd,  $J = 8.94, 1.70$  Hz, 1H), 4.39 (dd,  $J = 8.77, 6.38$  Hz, 1H), 4.24 (dq,  $J = 6.22, 6.21, 6.21, 1.69$  Hz, 1H), 3.71 (s, 3H), 3.32 (d,  $J = 4.00$  Hz, 1H), 2.11-1.72 (m, 4H), 1.65-1.53 (m, 1H), 1.49-1.32 (m, 1H), 1.11 (s, 9H), 1.16 (d,  $J = 6.27$  Hz, 3H), 1.02-0.87 (m, 12H), 1.30-1.21 (m, 2H).

### Ac-Ile<sub>2</sub>-Thr(tBu)OMe

H-Ile<sub>2</sub>Thr(tBu)OMe (93 mg, 224  $\mu\text{mol}$ ) was dissolved in 5 mL DCM. DiPEA (270  $\mu\text{mol}$ , 44  $\mu\text{L}$ , 1.2 equiv.) was added, followed by  $\text{Ac}_2\text{O}$  (246  $\mu\text{mol}$ , 23  $\mu\text{L}$ , 1.1 equiv.). After 1hr, the mixture was washed with 1M HCl (2x),  $\text{H}_2\text{O}$  and dried over  $\text{Na}_2\text{SO}_4$ . Column chromatography (10% EA/tol  $\rightarrow$  60% EA/tol) yielded the title compound (93 mg, 203  $\mu\text{mol}$ , 93%).  $^1\text{H}$  NMR (400 MHz,  $\text{CDCl}_3$ )  $\delta$  ppm 6.89 (d,  $J = 9.06$  Hz, 1H), 6.83 (d,  $J = 8.99$  Hz, 1H), 4.57-4.48 (m, 3H), 4.21 (dq,  $J = 6.18, 6.18, 6.16, 1.97$  Hz, 1H), 3.71 (s, 3H), 1.91-1.70 (m, 2H), 1.62-1.48 (m, 2H), 1.33-1.20 (m, 2H), 1.13 (d,  $J = 6.30$  Hz, 3H), 1.11 (s, 9H), 0.95 (d,  $J = 6.76$  Hz, 3H), 0.92-0.83 (m, 9H), 2.02 (s, 3H).  $^{13}\text{C}$  NMR (100 MHz,  $\text{CDCl}_3$ )  $\delta$  ppm 171.51,

171.32, 170.79, 169.90, 74.02, 67.14, 57.66, 57.46, 51.96, 37.80, 37.55, 28.20, 24.96, 24.85, 23.00, 20.47, 15.15, 15.00, 11.35, 11.27.

### Ac-Ile<sub>2</sub>-Thr(tBu)NHNH<sub>2</sub>

Ac-Ile<sub>2</sub>Thr(tBu)OMe (93 mg, 203 μmol) was dissolved in MeOH (7 mL). Hydrazine hydrate (12.2 mmol, 590 μL, 60 equiv.) was added, and the mixture was refluxed for 48 hr after which the mixture was coevaporated with toluene (3x) the residue was used without further purification.

### Ac(Ser(tBu))<sub>2</sub>-Thr(tBu)-Leu-AMC

Boc-Leu-AMC (57 μmol, 25 mg, 1.1 equiv.) was dissolved in 1:1 DCM:TFA and stirred for 30 min before being coevaporated with toluene (3x) to yield TFA·H-Leu-AMC which was used without further purification. Ac(Ser(tBu))<sub>2</sub>Thr(tBu)NHNH<sub>2</sub> (27 mg, 52 μmol, 1 equiv.) was dissolved in 2 mL DMF and 2 mL EA and cooled to -30°C. tBuONO (57 μmol, 6.8 μL, 1.1 equiv.) and HCl (146 μmol, 36 μL 4M/dioxane sln, 2.8 equiv.) were added and the mixture was stirred at -30°C for 3h. The TFA·H-Leu-AMC in DMF was added, followed by DiPEA (260 μmol, 43 μL, 5 equiv.) and the mixture was allowed to warm to RT o/n. The mixture was diluted with EA and washed with H<sub>2</sub>O (3x), dried with Na<sub>2</sub>SO<sub>4</sub>. Column chromatography (DCM → 2% MeOH:DCM) yielded the title compound (11 mg isolated, 14 μmol, 27%). <sup>1</sup>H NMR (400 MHz, CDCl<sub>3</sub>/CD<sub>3</sub>OD 1/1) δ ppm 7.76 (d, *J* = 2.02 Hz, 1H), 7.66-7.61 (m, 1H), 7.53 (d, *J* = 8.72 Hz, 1H), 6.18-6.15 (m, 1H), 4.53-4.41 (m, 2H), 4.31-4.27 (m, 2H), 3.77 (dd, *J* = 9.31, 3.66 Hz, 1H), 3.67 (dd, *J* = 9.16, 4.49 Hz, 1H), 3.56 (dd, *J* = 9.27, 5.95 Hz, 1H), 3.46 (dd, *J* = 9.13, 7.00 Hz, 1H), 2.42-2.37 (m, 3H), 1.97 (s, 3H), 1.18 (s, 9H), 1.18 (s, 9H), 1.14 (s, 9H), 0.99-0.89 (m, 6H), 1.81-1.63 (m, 3H), 1.26-1.19 (m, 3H). <sup>13</sup>C NMR (100 MHz, CDCl<sub>3</sub>/CD<sub>3</sub>OD 1/1) δ ppm 171.17, 171.07, 170.95, 170.20, 161.83, 153.62, 153.06, 141.48, 124.92, 124.85, 115.93, 115.77, 112.55, 107.10, 74.82, 74.08, 65.82, 60.92, 60.56, 59.02, 54.57, 53.22, 52.72, 40.27, 27.83, 26.86, 26.77, 24.51, 22.68, 22.11, 21.01, 18.89, 18.07.

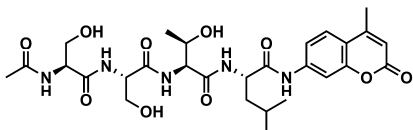

### Ac-Ser<sub>2</sub>-Thr-Leu-AMC

Ac(Ser(tBu))<sub>2</sub>Thr(tBu)LeuAMC (11 mg, 14 μmol) was dissolved in TFA and the mixture was stirred for 2h. The mixture was coevaporated with tol (3x) and the residue used without further purification. LCMS (gradient 10% → 90% ACN/(0.1% TFA/H<sub>2</sub>O)) 13.5 min run: Rt (min): 5.70 (ESI-MS (m/z): 606.00 (M + H<sup>+</sup>)). <sup>1</sup>H NMR (400 MHz, CDCl<sub>3</sub>/CD<sub>3</sub>OD 1/1) δ ppm 7.89 (d, *J* = 1.67 Hz, 1H), 7.70-7.64 (m, 2H), 6.25-6.21 (m, 1H), 4.61-4.50 (m, 1H), 4.49-4.40 (m, 2H), 4.36-4.25 (m, 2H), 4.01 (dd, *J* = 11.15, 4.64 Hz, 1H), 3.93-3.75 (m, 3H), 2.47 (s, 3H), 2.06 (s, 3H), 1.80-1.71 (m, 2H), 1.03-0.92 (m, 6H), 1.33-1.23 (m, 4H).

### AcIle<sub>2</sub>-Thr(tBu)-Leu-AMC

BocLeuAMC (48 mg, 124 μmol, 1.1 equiv.) was stirred in 1:1 DCM:TFA for 30 min before being coevaporated with toluene (3x). AcIle<sub>2</sub>Thr(tBu)NHNH<sub>2</sub> (113 μmol, 52 mg) was dissolved in 12 mL DMF:EA 1:1 and cooled to -30°C. tBuONO (124 μmol, 15 μL, 1.1 equiv.) and HCl (316 μmol, 79 μL 4M/dioxane sln, 2.8 equiv.) were added and the mixture was stirred at -30°C for 3 hr. The TFA·H-Leu-AMC in DMF was added, followed by DiPEA (565 μmol, 93 μL, 5 equiv.) and the mixture was allowed to warm to RT o/n. The mixture was diluted with EA and

washed with H<sub>2</sub>O (3x), dried with Na<sub>2</sub>SO<sub>4</sub>. Column chromatography (1% MeOH:DCM → 4% MeOH:DCM, 2x) yielded the title compound (13 mg isolated, 18 μmol, 16%). <sup>1</sup>H NMR (400 MHz, CD<sub>3</sub>OD, CDCl<sub>3</sub>) δ ppm 8.06-7.96 (m, 1H), 7.86-7.83 (m, 1H), 7.65-7.59 (m, 2H), 6.24-6.21 (m, 1H), 4.66-4.58 (m, 1H), 4.51-4.46 (m, 1H), 4.35-4.26 (m, 2H), 4.14-4.08 (m, 1H), 2.48-2.45 (m, 3H), 2.03 (s, 3H), 1.92-1.79 (m, 2H), 1.78-1.66 (m, 3H), 1.62-1.49 (m, 2H), 1.22-1.14 (m, 2H), 1.23 (s, 9H), 1.11 (d, *J* = 1.67 Hz, 3H), 1.02-0.86 (m, 18H).

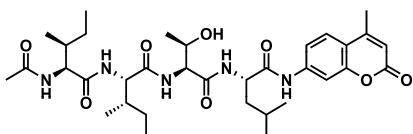

### **Acle<sub>2</sub>-Thr-Leu-AMC**

Acle<sub>2</sub>Thr(tBu)LeuAMC (13 mg, 18 μmol) was dissolved in TFA and the mixture was stirred for 2h. The mixture was coevaporated with tol (3x) and the residue used without further purification. LCMS (gradient 10% → 90% ACN/(0.1% TFA/H<sub>2</sub>O)) 13.5 min run: Rt (min): 8.09 (ESI-MS (m/z): 658.07 (M + H<sup>+</sup>)). <sup>1</sup>H NMR (400 MHz, CDCl<sub>3</sub>/CD<sub>3</sub>OD 1/1) δ ppm 8.06-7.99 (m, 1H), 7.88 (d, *J* = 1.32 Hz, 1H), 7.67-7.61 (m, 2H), 6.23 (s, 1H), 4.65-4.57 (m, 1H), 4.42-4.38 (m, 1H), 4.32-4.16 (m, 3H), 2.47 (s, 3H), 2.04 (s, 3H), 1.04-0.82 (m, 18H), 1.98-1.48 (m, 5H), 1.34-1.16 (m, 7H).
